# Supplementary material for: Apolipoproteins as Differentiating and Predictive Markers for Assessing Clinical Outcomes in Patients with Small Cell Lung Cancer
Source: PubMed Central journal article supplement — Yonsei Med J. 2016 Mar 15;57(3):549–56. doi: 10.3349/ymj.2016.57.3.549 (PMC4800341; doi:10.3349/ymj.2016.57.3.549), 2016-03-15
Supplement: ymj-57-549-s001.pdf [file ymj-57-549-s001.pdf]

**Supplementary Table 1.** The Expression of Apolipoproteins in SCLC Tissues Under Different Conditions

| Characteristics                                                           |            | ApoA-1        |               | ApoC-III      |               | ApoE          |               |
|---------------------------------------------------------------------------|------------|---------------|---------------|---------------|---------------|---------------|---------------|
| Gender                                                                    | Men (60)   | 26.7% (16/60) | 76.7% (44/60) | 41.7% (25/60) | 58.3% (35/60) | 23.1% (14/60) | 76.7% (46/60) |
|                                                                           | Women (29) | 27.6% (8/29)  | 72.4% (21/29) | 41.4% (12/29) | 58.6% (17/29) | 20.7% (6/29)  | 79.3% (23/29) |
| Stage                                                                     | I (12)     | 25% (3/12)    | 75% (9/12)    | 50% (6/12)    | 50% (6/12)    | 25% (3/12)    | 75% (8/12)    |
|                                                                           | II (19)    | 31.6% (6/19)  | 68.4% (13/19) | 31.6% (6/19)  | 68.4% (13/19) | 36.8% (7/19)  | 63.2% (12/19) |
|                                                                           | III (52)   | 31.0% (9/29)  | 69.0% (20/29) | 48.3% (14/29) | 51.7% (15/29) | 17.2% (5/29)  | 82.8% (24/29) |
|                                                                           | IV (4)     | 25% (1/4)     | 75% (3/4)     | 0% (0/4)      | 100% (4/4)    | 25% (1/4)     | 75% (3/4)     |
| Two cases were excluded because re-inspection was not performed           |            |               |               |               |               |               |               |
| Metastasis                                                                | N0 (24)    | 25% (6/24)    | 75% (18/24)   | 45.8% (11/24) | 54.2% (13/24) | 25% (6/24)    | 75% (18/24)   |
|                                                                           | N1 (22)    | 36.4% (8/22)  | 63.6% (14/22) | 27.3% (6/22)  | 81.8% (16/22) | 31.8% (7/22)  | 68.2% (14/22) |
|                                                                           | N2 (35)    | 22.9% (8/35)  | 77.1% (27/35) | 48.6% (17/35) | 51.4% (18/35) | 22.9% (8/35)  | 77.1% (27/35) |
|                                                                           | N3 (2)     | 0% (0/2)      | 100% (2/2)    | 50% (1/1)     | 50% (1/1)     | 0% (0/2)      | 100% (2/2)    |
| NX (7 cases; excluded because patients were treated in other hospitals)   |            |               |               |               |               |               |               |
| Tumor size                                                                | T1a (6)    | 33.3% (2/6)   | 66.7% (4/6)   | 50% (3/6)     | 50% (3/6)     | 16.7% (1/6)   | 83.3% (5/6)   |
|                                                                           | T1b (10)   | 30% (3/10)    | 70% (7/10)    | 30% (3/10)    | 70% (7/10)    | 20% (2/6)     | 80% (8/10)    |
|                                                                           | T2a (16)   | 25% (4/16)    | 75% (12/16)   | 31.3% (5/16)  | 68.7% (11/16) | 37.5% (6/16)  | 62.5% (10/16) |
|                                                                           | T2b (10)   | 10% (1/10)    | 90% (9/10)    | 40% (4/10)    | 60% (6/10)    | 20% (2/10)    | 80% (8/10)    |
|                                                                           | T3 (12)    | 50% (6/12)    | 50% (6/12)    | 66.6% (8/12)  | 33.4% (4/12)  | 25% (3/12)    | 75% (9/12)    |
|                                                                           | T4 (28)    | 28.6% (8/28)  | 71.4% (20/28) | 42.9% (12/28) | 57.1% (16/28) | 21.4% (6/28)  | 78.6% (22/28) |
| TX 7 (7 cases; excluded because patients were treated in other hospitals) |            |               |               |               |               |               |               |

SCLC, small cell lung cancer.
